# Supplementary material for: New insights into salvianolic acid A action: Regulation of the TXNIP/NLRP3 and TXNIP/ChREBP pathways ameliorates HFD-induced NAFLD in rats
Source: PubMed Central journal article supplement (PMC4922017; doi:10.1038/srep28734), 2016-06-27
Supplement: srep28734-s1.pdf [file srep28734-s1.pdf]

## Supplementary information

# **New insights into salvianolic acid A action: Regulation of the TXNIP/NLRP3 and TXNIP/ChREBP pathways ameliorates HFD-induced NAFLD in rats**

Chunchun Ding<sup>1</sup>, Yan Zhao<sup>1</sup>, Xue Shi<sup>1</sup>, Ning Zhang<sup>1</sup>, Guo Zu<sup>2</sup>, Zhenlu Li<sup>2</sup>, Junjun Zhou<sup>1</sup>, Dongyan Gao<sup>1</sup>, Li LV<sup>1</sup>, Xiaofeng Tian<sup>2</sup>, Jihong Yao<sup>1</sup>

<sup>1</sup>*Department of Pharmacology, Dalian Medical University, Dalian, 116044, China*

<sup>2</sup>*Department of General Surgery, Second Affiliated Hospital of Dalian Medical University, Dalian, 116023, China*

\*Corresponding author

Dr. Jihong Yao

Department of Pharmacology

Dalian Medical University

Dalian, China

Email: yaojihong65@hotmail.com

## Supplementary Figure 1.

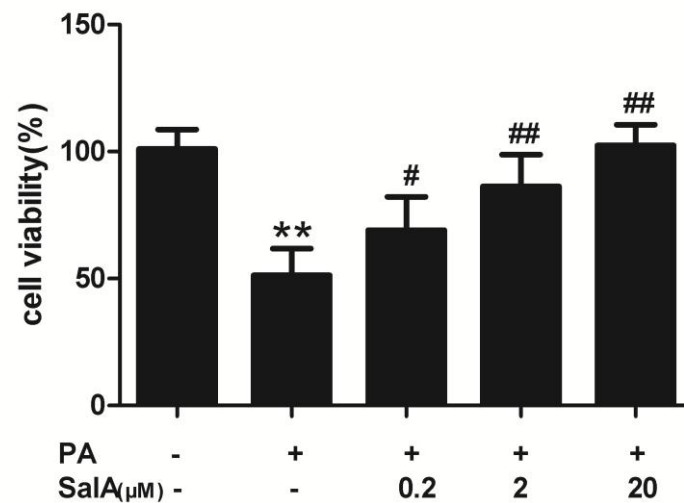

Supplementary Figure 1. **SalA protects HepG2 cells against PA-induced cytotoxicity.** HepG2 cells were pretreated with SalA (0.2, 2, 20 μM) for 6 h and then subjected to 0.5 mM PA for 24 h. The viable cells were determined using the MTT reduction assay. Data are expressed as means ± SD. \*\*  $P < 0.01$  vs. the control group, #  $P < 0.05$ , ##  $P < 0.01$  vs. the PA group (n = 8).

## Supplementary Table 1.

**Table 1**

Primers for the RT-PCR assay.

| Primer  | Sequence                                            |
|---------|-----------------------------------------------------|
| TXNIP   | F: AAGCGTTGAGTAGTACAGATGAG<br>R: ATGGCGTGGCAAGAGTC  |
| NLRP3   | F: AGCCTCAGGGCACCAA<br>R: GGGATGAAGCACATAGTAAACA    |
| β-actin | F: GGAAATCGTGCGTGACATTAAAG<br>R: CGGCAGTGGCCATCTCTT |
